# Supplementary material for: Mechanistic insights into the rhodium-catalyzed aryl C–H carboxylation
Source: Royal Society of Chemistry journal article supplement (doi:10.1039/d1qo01560e), 2021-12-06
Supplement: d1qo01560e2.pdf [file d1qo01560e2.pdf]

# Supporting Information

## Mechanistic Insights into the Rhodium- Catalyzed Aryl C–H Carboxylation

Liu, et al

## Table of Contents

|                                                                                   |     |
|-----------------------------------------------------------------------------------|-----|
| 1. The full optimized structure of rhodium catalysts.....                         | S03 |
| 2. The thermodynamic data of pre-activation .....                                 | S03 |
| 3. The coordination state of initially rhodium dimer.....                         | S03 |
| 4. The strategies for rhodium dimer dissociation .....                            | S04 |
| 5. The ligand exchange between hemicarbonatate and acetate .....                  | S04 |
| 6. The other possible C-H bond activation methods.....                            | S05 |
| 7. The acetate dissociation on earlier intermediates .....                        | S05 |
| 8. The spontaneous rearrangement of Rh8.....                                      | S06 |
| 9. The scan data of direct carboxylation in the Rh-O site .....                   | S07 |
| 10. the direct carboxylation pathway from Rh7 .....                               | S07 |
| 11. The other schemes of lactonization from Rh14 or Rh14'.....                    | S07 |
| 12. Proton transfer and lactonization after Rh-O carboxylation .....              | S09 |
| 13. Comparison of the ability of different proton receptors .....                 | S09 |
| 14. The scheme of CO <sub>2</sub> directly insert into the Rh-C bond of Rh4 ..... | S10 |
| 15. Gibbs free energy data of different bases (and conjugated acids).....         | S10 |
| 16. More O'Ferrall-Jencks Plots .....                                             | S11 |
| 17. The influence of phosphine ligands on reactivity.....                         | S12 |
| 18. Reference .....                                                               | S13 |

## 1. The full optimized structure of rhodium catalysts

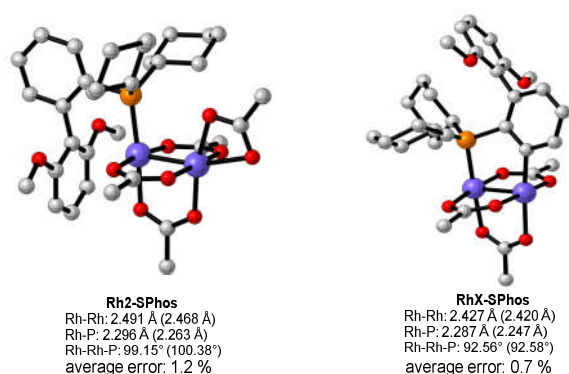

**Figure S1.** The full optimized structure of rhodium catalysts, the X-ray single-crystal diffraction data<sup>1</sup> is shown in brackets.

## 2. The thermodynamic data of pre-activation

The excessive <sup>t</sup>BuOK could react with **1a** to afford the potassium phenate (**1aK**) with a free energy decrease of 21.7 kcal/mol (Figure S2). CO<sub>2</sub> can react with the generated **1aK**, <sup>t</sup>BuOH and the remaining <sup>t</sup>BuOK (eq. 1-3), and the results indicate that the remaining <sup>t</sup>BuOK would transform to <sup>t</sup>BuOCO<sub>2</sub>K.

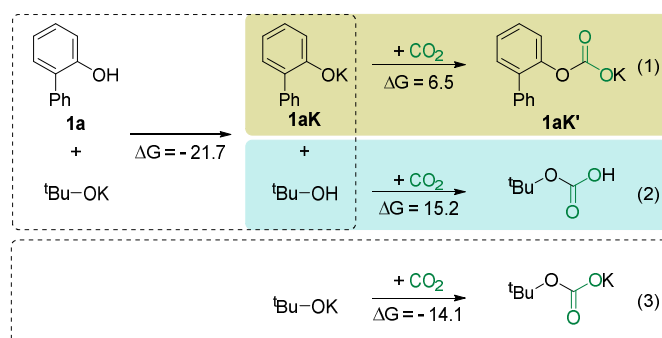

**Figure S2.** Thermodynamic data of acid-base reaction in the system

## 3. The coordination state of initially rhodium dimer

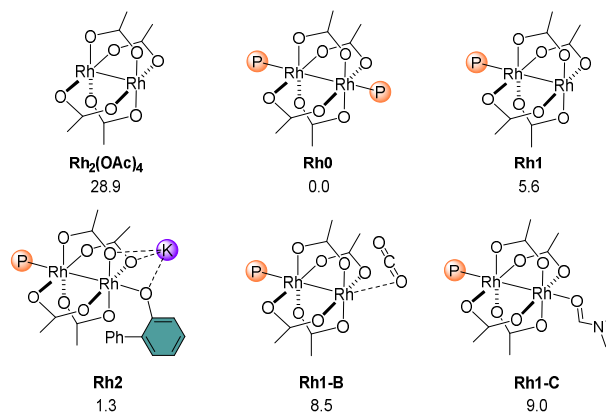

**Figure S3.** Gibbs free energy of rhodium dimer in different states ( $\Delta G$  are given in kcal/mol, P = PCy<sub>3</sub>).

#### 4. The strategies for rhodium dimer dissociation

Combining the calculation results (Figure S4) and X-ray diffraction data of Li et al.,<sup>1</sup> the dissociation of the rhodium dimer catalyst was hard to achieve under the current reaction conditions.

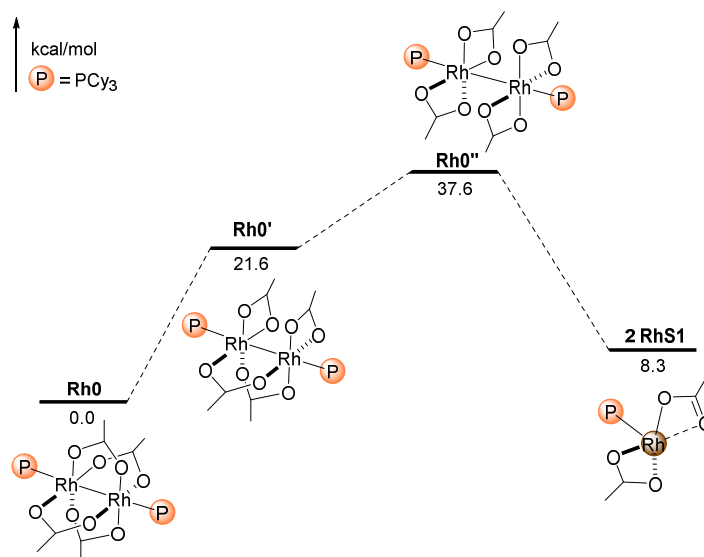

Figure S4. Gibbs free energy profiles of the rhodium catalyst dissociation

#### 5. The ligand exchange between hemicarboxylate and acetate

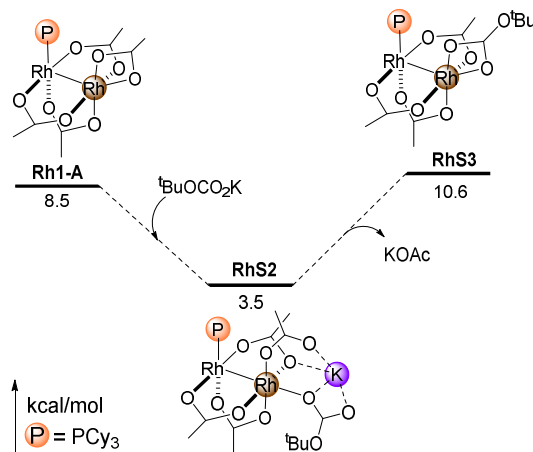

Figure S5. Gibbs free energy profiles of ligand exchange between hemicarboxylate and acetate

## 6. The other possible C-H bond activation methods

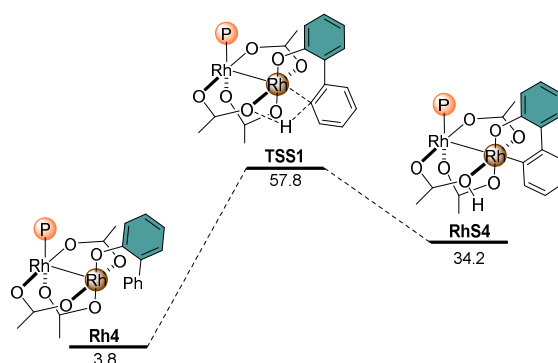

Figure S6. Gibbs free energy profiles of the C-H bond cleavage step via 1,2-addition.

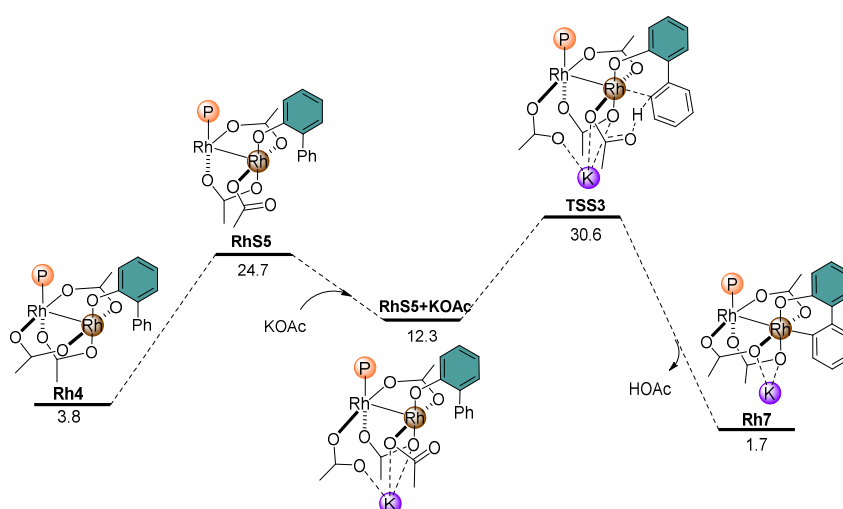

Figure S7. Gibbs free energy profiles of the C-H bond cleavage step via internal base Ac<sup>-</sup>.

## 7. The acetate dissociation on earlier intermediates

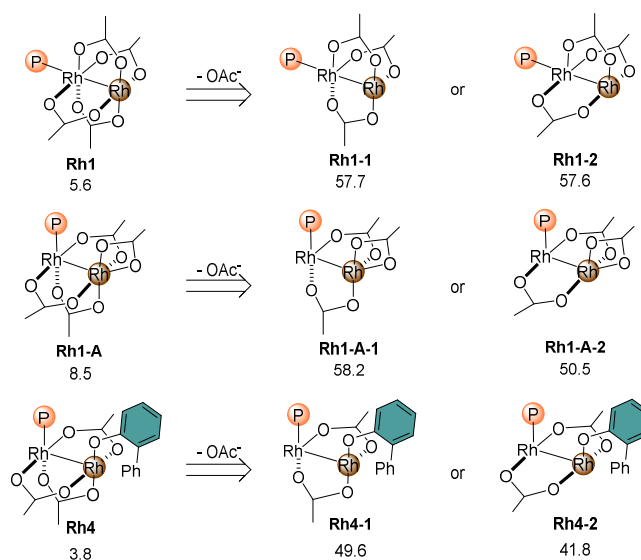

Figure S8. Acetate dissociation on the earlier intermediates ( $\Delta G$  are given in kcal/mol, P = PCy<sub>3</sub>)

## 8. The spontaneous rearrangement of Rh8

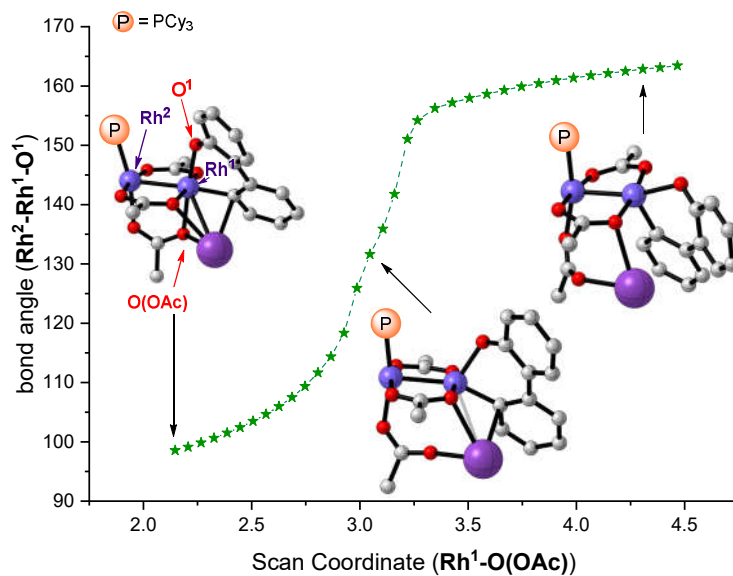

**Figure S9.** The scan data of **Rh7** dissociated potassium acetate to produce **Rh8**.

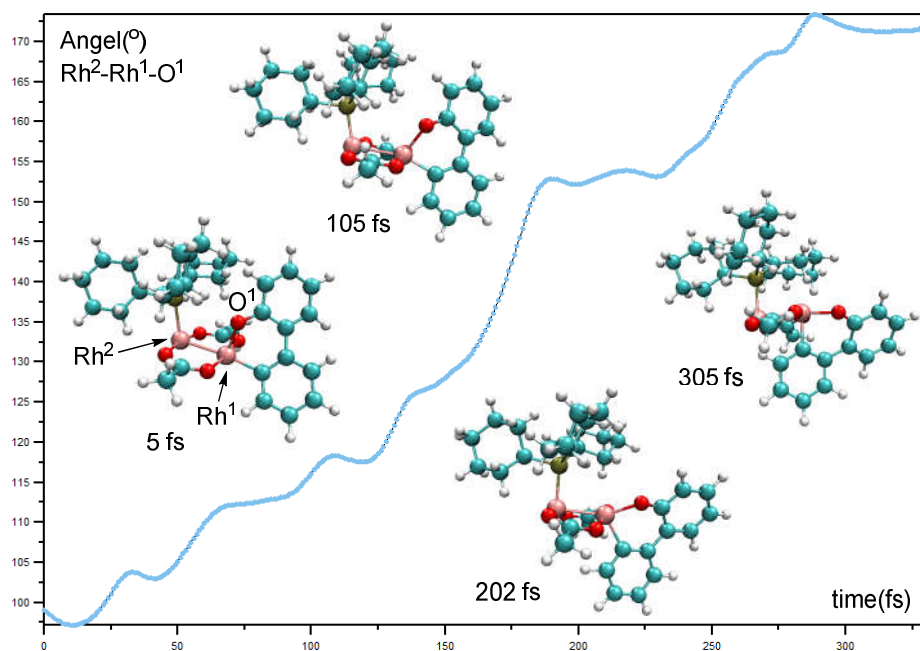

**Figure S10.** The bond angle ( $\text{Rh}^2\text{-Rh}^1\text{-O}^1$ ) relationship of **Rh8** in molecular dynamics analysis via ORCA 5.0.1 program<sup>2</sup> and VMD 1.9.3<sup>3</sup> (Functional: B97-3c,<sup>4</sup>  $T = 373.15$  K, timestep = 1.0 fs).

## 9. The scan data of direct carboxylation in the Rh-O site

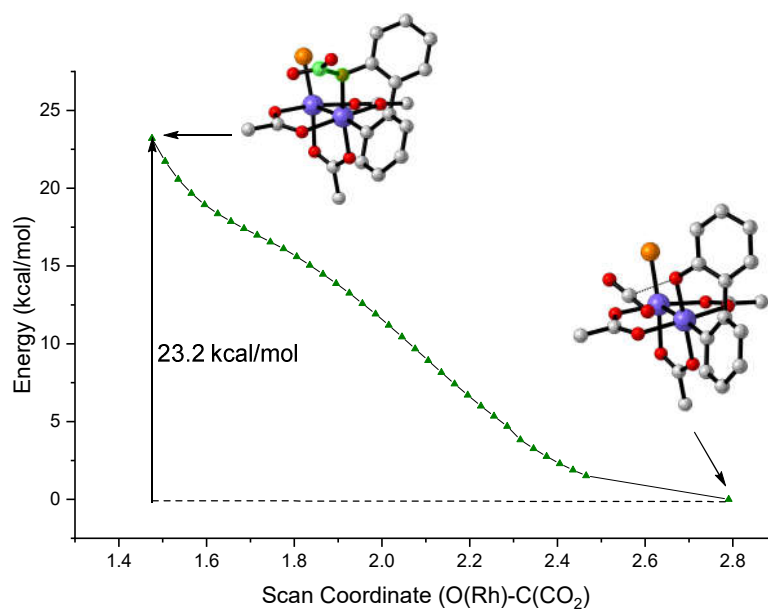

Figure S11. The scan data of direct carboxylation in the Rh-O site from Rh15 to Scan-TS4.

## 10. the direct carboxylation pathway from Rh7

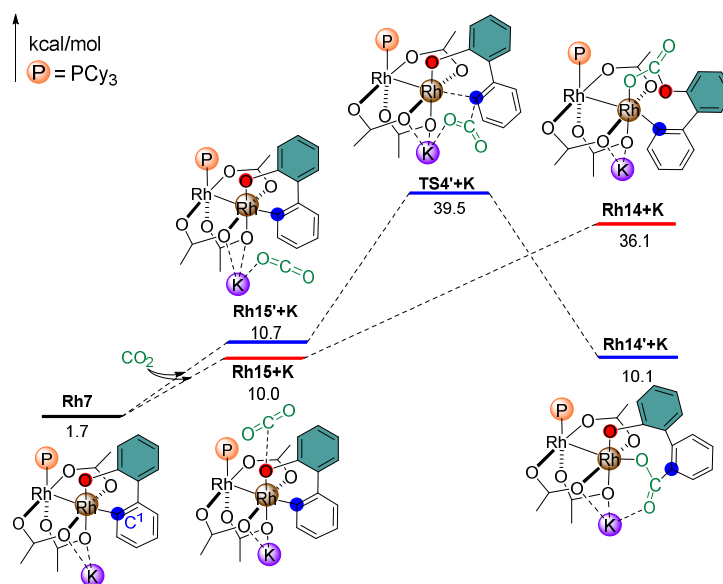

Figure S12. Gibbs free energy profiles of the direct carboxylation pathway from Rh7.

## 11. The other schemes of lactonization from Rh14 or Rh14'

(i) The direct lactonization pathways

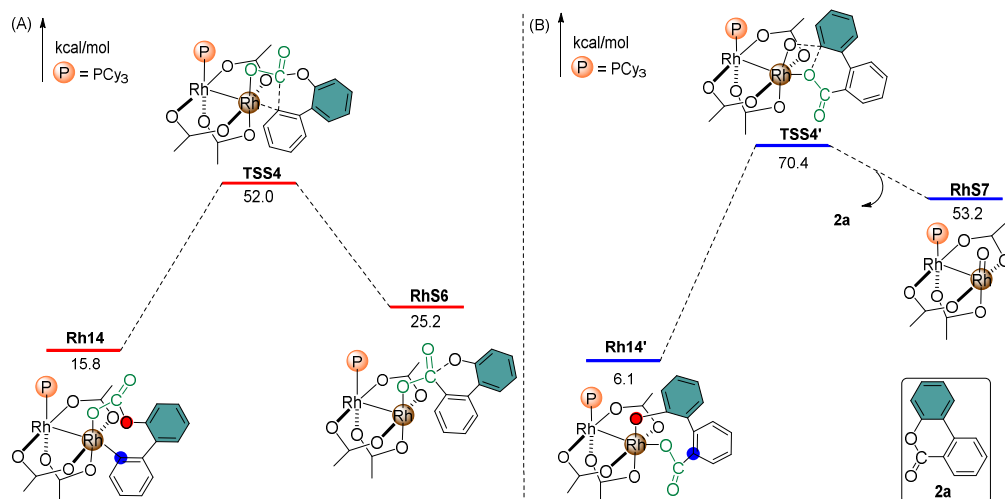

**Figure S13.** Gibbs free energy profiles of the direct lactonization from **Rh14** (A) or **Rh14'** (B) species.

(ii) The CO<sub>2</sub>-assisted lactonization pathways

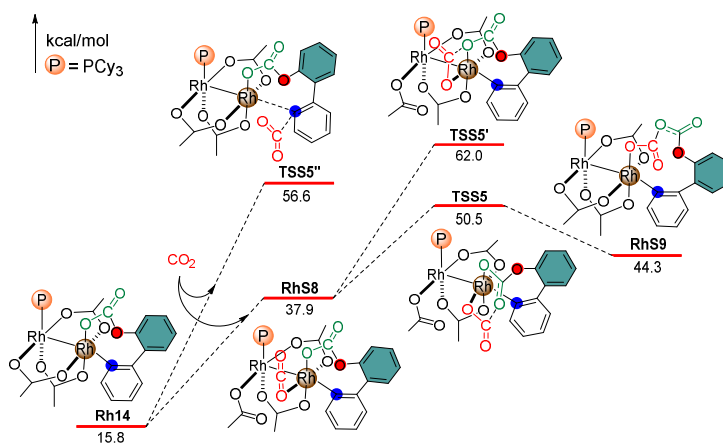

**Figure S14.** Gibbs free energy profiles of the CO<sub>2</sub>-assisted lactonization from **Rh14**.

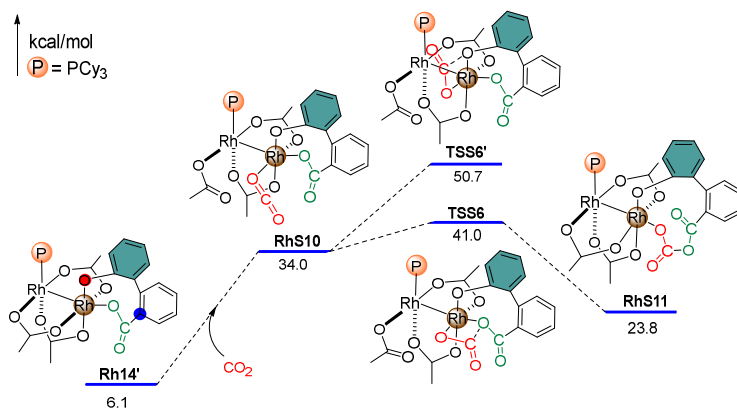

**Figure S15.** Gibbs free energy profiles of the CO<sub>2</sub>-assisted lactonization from **Rh14'**.

(iii) The CO<sub>2</sub>-assisted rearrangement and lactonization pathways

After the O<sup>1</sup> atom of **Rh14'** dissociated and rearranged to four-membered metallacycle species



**RhS13**, then go through the CO<sub>2</sub> insertion to form **RhS14**. In addition, the O<sup>1</sup> atom of **Rh12** could also be electrophilically attacked by CO<sub>2</sub> to generate a ten-membered metallacycle species **RhS16**. And then transfer into the six-membered metallacycle species **RhS17**. Unfortunately, the energy barriers of these two options are both beyond the allowable value.

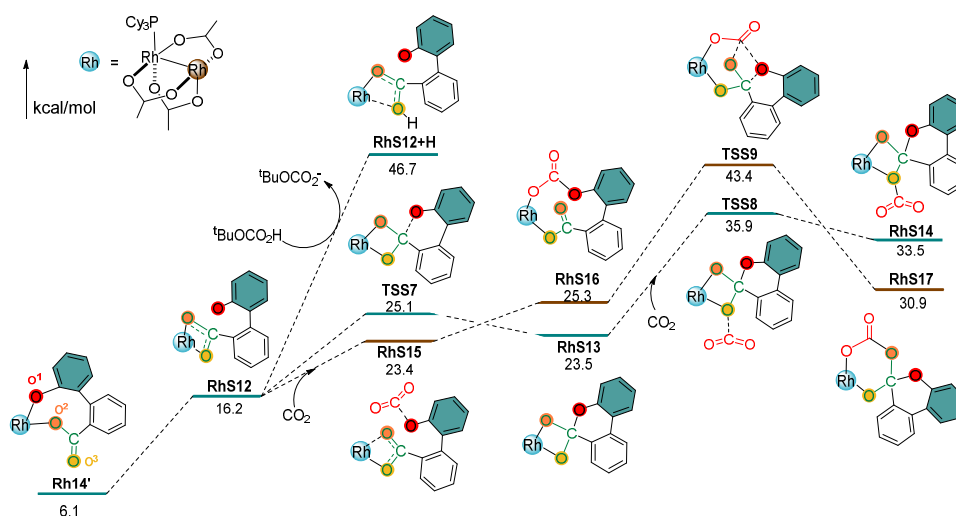

Figure S16. Gibbs free energy profiles of the lactonization with **Rh14'**.

## 12. Proton transfer and lactonization after Rh-O carboxylation

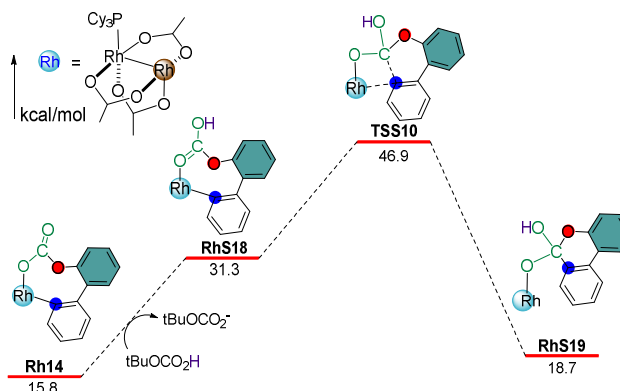

Figure S17. Gibbs free energy profiles of the lactonization steps after protonation of **Rh14**.

## 13. Comparison of the ability of different proton receptors

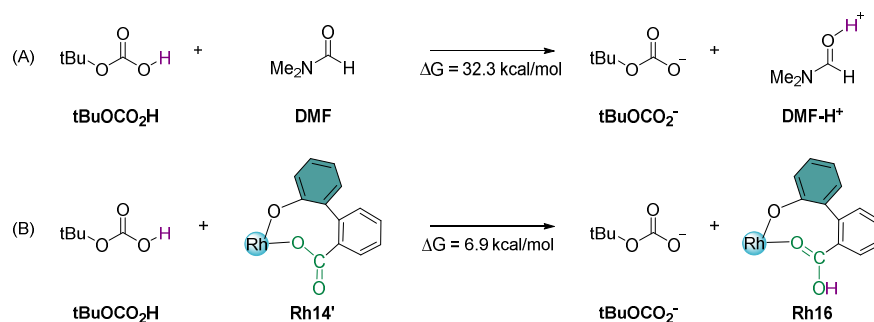

Figure S18. Comparison of the ability of different proton receptors to capture protons.

#### 14. The scheme of CO<sub>2</sub> directly insert into the Rh-C bond of Rh4

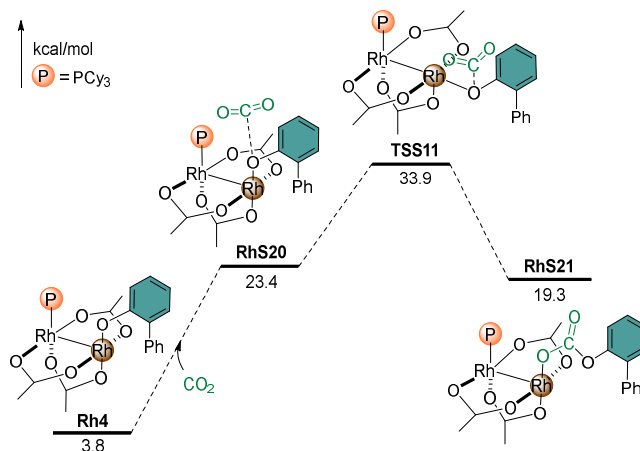

Figure S19. Gibbs free energy data of CO<sub>2</sub> insertion with Rh4.

#### 15. Gibbs free energy data of different bases (and conjugated acids)

<sup>t</sup>BuOK and the corresponding derivatives have been performed to produce potassium phenate (in the form of <sup>t</sup>BuOK), facilitate the C-H metalation (in the form of <sup>t</sup>BuOCO<sub>2</sub>K), and mediate the lactonization (in the form of <sup>t</sup>BuOCO<sub>2</sub>H).

From the calculated data in Table S1, it can be found that AcOK, <sup>t</sup>BuOCO<sub>2</sub>K, MeOCO<sub>2</sub>K and KHCO<sub>3</sub> can simultaneously satisfy the C-H bond activation and protonation. However, AcOK and KHCO<sub>3</sub> are not acidic enough to convert phenol to potassium phenate. <sup>t</sup>BuOCO<sub>2</sub>K and MeOCO<sub>2</sub>K can be obtained from the corresponding potassium alkoxide. Therefore, potassium alkoxide is an effective additive for reaction. Carbonate may also be suitable,<sup>1</sup> because carbonate and phenol can react to obtain bicarbonate, which then participates in the subsequent process.

**Table S1.** Gibbs free energy data of C-H bond activation with bases

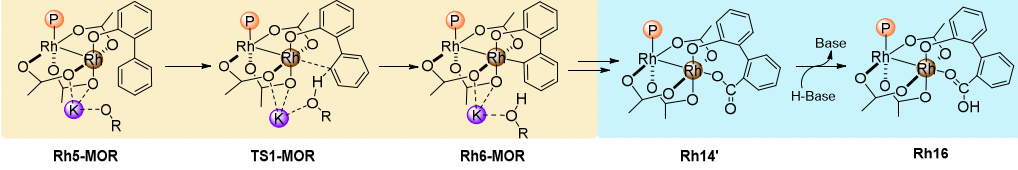

| Base (KOR)                         | Rh5-MOR | TS1-MOR | Rh6-MOR | $\Delta G^{\ddagger}$ (C-H activation) | $\Delta G^{\ddagger}$ | H-Base                             | $\Delta G^{\ddagger}$ (Proton Transfer) | pKa         |
|------------------------------------|---------|---------|---------|----------------------------------------|-----------------------|------------------------------------|-----------------------------------------|-------------|
| KOH                                | 2.7     | 9.5     | -24.4   | -27.1                                  | 6.8                   | H <sub>2</sub> O                   | 45.1                                    | 41.3        |
| tBuOK                              | 2.6     | 11.1    | -22.6   | -25.2                                  | 8.5                   | tBuOH                              | 39.4                                    | 39.2        |
| MeOK                               | 4.0     | 11.5    | -18.9   | -21.0                                  | 9.4                   | MeOH                               | 37.9                                    | 37.9        |
| K <sub>2</sub> CO <sub>3</sub>     | 4.3     | 14.6    | -17.3   | -21.5                                  | 10.3                  | KHCO <sub>3</sub>                  | 34.8                                    | 35.1        |
| AcOK                               | 5.9     | 25.0    | 7.6     | 3.2                                    | 19.1                  | AcOH                               | 12.8                                    | 21.9        |
| tBuOCO <sub>2</sub> K              | 4.0     | 23.8    | 5.1     | 1.1                                    | 19.8                  | tBuOCO <sub>2</sub> H              | 7.0                                     | 18.3        |
| MeOCO <sub>2</sub> K               | 4.4     | 26.4    | 9.4     | 5.0                                    | 22.0                  | MeOCO <sub>2</sub> H               | 6.2                                     | 17.9        |
| KHCO <sub>3</sub>                  | 6.4     | 28.2    | 12.8    | 6.9                                    | 21.8                  | H <sub>2</sub> CO <sub>3</sub>     | 4.9                                     | 17.2        |
| CF <sub>3</sub> CO <sub>2</sub> K  | 6.5     | 36.8    | 24.3    | 17.8                                   | 30.3                  | CF <sub>3</sub> CO <sub>2</sub> H  | -8.3                                    | 9.2         |
| KOPiv                              | 4.2     | 22.3    | 6.8     | 2.6                                    | 18.1                  | HOPIv                              | 11.8                                    | 21.3        |
| AllylCO <sub>2</sub> K             | 3.7     | 24.9    | 5.9     | 2.2                                    | 21.2                  | AllylCO <sub>2</sub> H             | 11.9                                    | <b>21.3</b> |
| CH <sub>2</sub> FCO <sub>2</sub> K | 4.5     | 27.4    | 14.6    | 10.1                                   | 22.9                  | CH <sub>2</sub> FCO <sub>2</sub> H | 5.8                                     | <b>17.7</b> |
| EtCO <sub>2</sub> K                | 4.8     | 24.0    | 5.6     | 0.8                                    | 19.2                  | EtCO <sub>2</sub> H                | 10.3                                    | <b>20.4</b> |
| nPrCO <sub>2</sub> K               | 4.2     | 22.9    | 4.9     | 0.8                                    | 18.7                  | nPrCO <sub>2</sub> H               | 14.6                                    | <b>23.0</b> |
| BnCO <sub>2</sub> K                | 5.7     | 23.6    | 6.3     | 0.5                                    | 17.9                  | BnCO <sub>2</sub> H                | 12.9                                    | <b>21.9</b> |
| PhCO <sub>2</sub> K                | 3.6     | 24.6    | 9.9     | 6.3                                    | 20.9                  | PhCO <sub>2</sub> H                | 9.7                                     | <b>20.0</b> |

## 16. More O’Ferrall-Jencks Plots

More O’Ferrall-Jencks plots<sup>5</sup> were constructed using Wiberg bond orders of M-C and C-H bonds. These bond orders were calculated using the Natural Bond Orbital (NBO)<sup>6</sup> software. In the More O’Ferrall-Jencks plots, the lines separating the CMD and the BIES regime were consequently constructed by connecting intermediate **Rh5** (the starting point of the C-H metalation process) with intermediate **Rh6**, which represents the C-H metalation product.

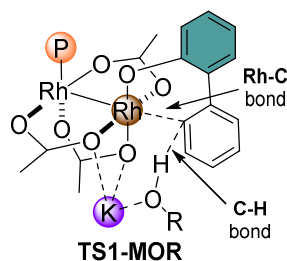

**Table S2.** Wiberg bond orders of M-C and C-H bonds.

| Wiberg bond orders                | Rh5-MOR  |           | TS1-MOR  |           | Rh6-MOR  |           |
|-----------------------------------|----------|-----------|----------|-----------|----------|-----------|
|                                   | C-H bond | Rh-C bond | C-H bond | Rh-C bond | C-H bond | Rh-C bond |
| <sup>t</sup> BuOK                 | 0.893    | 0.0708    | 0.525    | 0.324     | 0.001    | 0.722     |
| KHCO <sub>3</sub>                 | 0.893    | 0.0688    | 0.321    | 0.465     | 0.008    | 0.717     |
| K <sub>2</sub> CO <sub>3</sub>    | 0.884    | 0.1056    | 0.457    | 0.379     | 0.002    | 0.712     |
| <sup>t</sup> BuOCO <sub>2</sub> K | 0.893    | 0.0686    | 0.348    | 0.443     | 0.001    | 0.722     |
| KOAc                              | 0.893    | 0.0686    | 0.358    | 0.441     | 0.001    | 0.724     |

## 17. The influence of phosphine ligands on reactivity

As suggested by Houk et al.,<sup>7</sup> the structure of the transition state is artificially divided into two parts, one is the CO<sub>2</sub>-part, and the rest is labeled Rh-Part. Interestingly, the interaction energy ( $\Delta E_{int}$ ) negatively correlates with the carboxylation elementary step ( $\Delta G^\ddagger$ ). In contrast, there exists a positive correlation between the distortion energy ( $\Delta E_{dist} = \Delta E_{dist-Rh} + \Delta E_{dist-CO_2}$ ) and  $\Delta G^\ddagger$ .

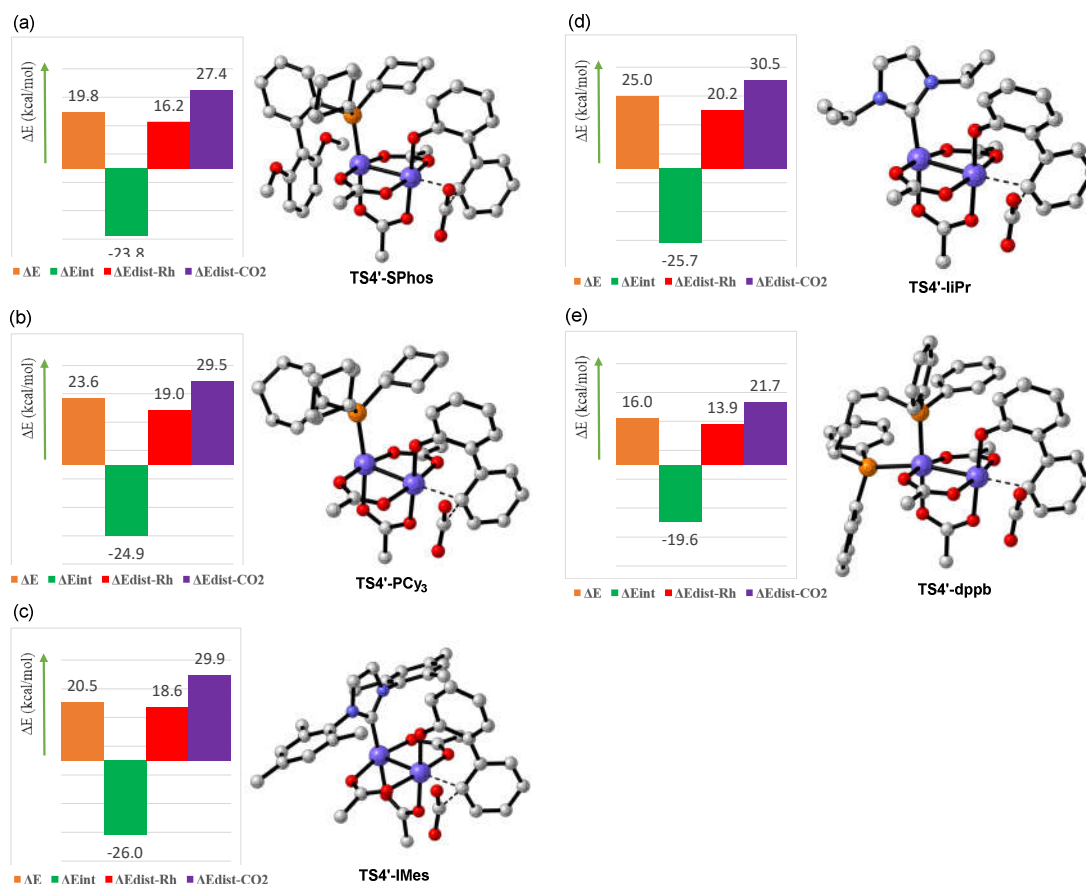

**Figure S20.** The distortion/interaction model analysis of **TS4'** with different ligands. (all the electron energies are obtained at the level of M06-D3/6-311+G(d,p)//SDD)

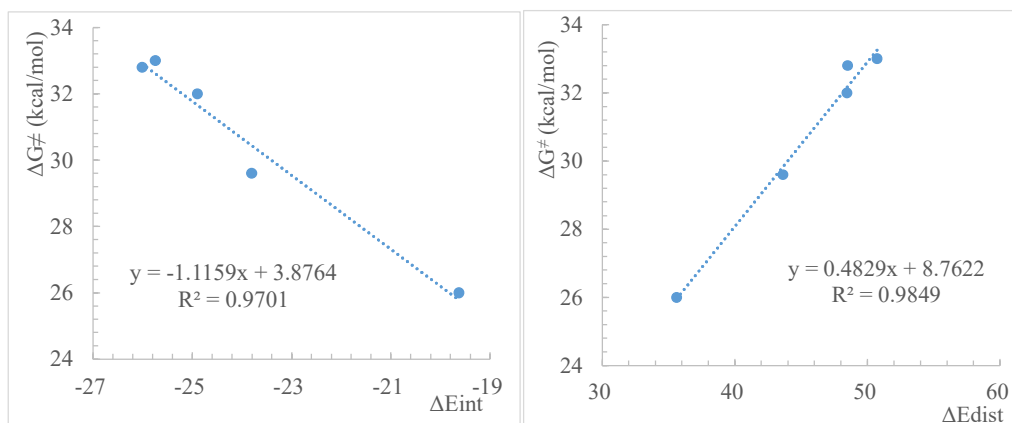

**Figure S21.** The relationship between energy barrier and interaction energy or distortion energy.

## 18. Reference

- (1) Fu, L.; Li, S.; Cai, Z.; Ding, Y.; Guo, X.-Q.; Zhou, L.-P.; Yuan, D.; Sun, Q.-F.; Li, G. Ligand-Enabled Site-Selectivity in a Versatile Rhodium(II)- $\alpha$ -Catalyzed Aryl C–H Carboxylation with  $\text{CO}_2$ . *Nat. Catal.* **2018**, *1*, 469-478.
- (2) (a) Neese, F. Software Update: The ORCA Program System, Version 4.0. *WIREs Comput. Mol. Sci.* **2018**, *8*, e1327. (b) Neese, F. The ORCA Program System. *WIREs Comput. Mol. Sci.* **2012**, *2*, 73-78.
- (3) Humphrey, W.; Dalke, A.; Schulten, K. Vmd: Visual Molecular Dynamics. *J. Mol. Graphics* **1996**, *14*, 33-38.
- (4) Brandenburg, J. G.; Bannwarth, C.; Hansen, A.; Grimme, S. B97-3c: A Revised Low-Cost Variant of the B97-D Density Functional Method. *J. Chem. Phys.* **2018**, *148*, 064104.
- (5) (a) Jencks, W. P. General Acid-Base Catalysis of Complex Reactions in Water. *Chem. Rev.* **1972**, *72*, 705-718. (b) O'Ferrall, R. A. M. Relationships between E2 and E1cb Mechanisms of B-Elimination. *J. Chem. Soc. B: Phys. Org.* **1970**, 274-277.
- (6) (a) Foster, J. P.; Weinhold, F. Natural Hybrid Orbitals. *J. Am. Chem. Soc.* **1980**, *102*, 7211-7218. (b) Reed, A. E.; Weinstock, R. B.; Weinhold, F. Natural Population Analysis. *J. Chem. Phys.* **1985**, *83*, 735-746.
- (7) (a) Liu, F.; Paton, R. S.; Kim, S.; Liang, Y.; Houk, K. N. Diels-Alder Reactivities of Strained and Unstrained Cycloalkenes with Normal and Inverse-Electron-Demand Dienes: Activation Barriers and Distortion/Interaction Analysis. *J. Am. Chem. Soc.* **2013**, *135*, 15642-15649. (b) Chen, S. M.; Huang, X. Q.; Meggers, E.; Houk, K. N. Origins of Enantioselectivity in Asymmetric Radical Additions to Octahedral Chiral- $\alpha$ -Rhodium Enolates: A Computational Study. *J. Am. Chem. Soc.* **2017**, *139*, 17902-17907.
